# Supplementary material for: Combined use of mitochondrial and nuclear genetic markers further reveal immature marine turtle hybrids along the South Western Atlantic
Source: PubMed Central journal article supplement (PMC7199923; doi:10.1590/1678-4685-gmb-2019-0098), 2020-04-27
Supplement: 1415-4757-GMB-43-2-e20190098-s1.pdf [file 1415-4757-GMB-43-2-e20190098-s1.pdf]

## Supplementary Material to “Combined use of mitochondrial and nuclear genetic markers further reveal immature marine turtle hybrids along the South Western Atlantic”

**Table S1** – Individual haplotypes for the three nuclear loci and mtDNA. Colors represent probable species of origin from the haplotype: *E. imbricata* (green), *C. caretta* (red), or shared *E.imbricata/L.olivacea* (yellow). The row mtDNA denotes hybrid individuals classified from mtDNA data, while the row nuDNA denotes individuals classified as hybrids from nuclear data. Samples with indication of introgression/backcrossing are shown in bold. Region and site abbreviations follow Figures 1 and 3.

| Sample | Site | Region | RAG1.1 | RAG1.2 | RAG2.1 | RAG2.2 | CMOS.1 | CMOS.2 | HAP mtDNA | mtDNA | nDNA |
|--------|------|--------|--------|--------|--------|--------|--------|--------|-----------|-------|------|
| AB01   | AB   | AB     | 1      | 3      | 5      | 5      |        |        | EiA01     |       |      |
| AB02   | AB   | AB     | 3      | 3      | 5      | 5      |        |        | EiA32     |       |      |
| AB03   | AB   | AB     | 1      | 3      | 5      | 5      |        |        | EiA01     |       |      |
| AB04   | AB   | AB     | 3      | 3      | 5      | 5      |        |        | EiA01     |       |      |
| AB05   | AB   | AB     | 3      | 3      | 5      | 5      |        |        | EiA01     |       |      |
| AB06   | AB   | AB     | 3      | 3      | 5      | 5      | 3      | 3      | EiA01     |       |      |
| AB07   | AB   | AB     | 3      | 3      | 5      | 5      |        |        | EiA01     |       |      |
| AB08   | AB   | AB     |        |        | 5      | 5      |        |        | EiA01     |       |      |
| AB09   | AB   | AB     | 3      | 3      | 5      | 5      |        |        | EiA01     |       |      |
| AB10   | AB   | AB     | 3      | 3      | 5      | 5      |        |        | EiA01     |       |      |
| AB11   | AB   | AB     | 3      | 3      | 5      | 5      |        |        | EiA01     |       |      |
| AB12   | AB   | AB     | 3      | 3      | 5      | 5      |        |        | EiA01     |       |      |
| AB13   | AB   | AB     | 3      | 3      | 5      | 5      |        |        | EiA01     |       |      |
| AB14   | AB   | AB     |        |        |        |        |        |        | EiA01     |       |      |
| AB15   | AB   | AB     | 3      | 3      | 5      | 5      |        |        | EiA01     |       |      |
| AB16   | AB   | AB     | 3      | 3      | 5      | 5      |        |        | EiA01     |       |      |
| AB17   | AB   | AB     | 3      | 3      | 5      | 5      | 3      | 3      | EiA01     |       |      |
| AB18   | AB   | AB     | 3      | 3      | 5      | 5      |        |        | EiA01     |       |      |
| AB19   | AB   | AB     | 4      | 3      |        |        |        |        | EiA01     |       |      |
| AB20   | AB   | AB     | 3      | 3      |        |        |        |        | EiA01     |       |      |
| AB21   | AB   | AB     | 3      | 3      | 5      | 5      |        |        | EiA01     |       |      |
| AB22   | AB   | AB     | 3      | 3      | 5      | 5      |        |        | EiA01     |       |      |
| AB23   | AB   | AB     |        |        |        |        |        |        | EiA01     |       |      |
| AB24   | AB   | AB     |        |        |        |        |        |        | EiA01     |       |      |
| AB25   | AB   | AB     |        |        | 5      | 5      | 3      | 3      | EiA01     |       |      |
| AB26   | AB   | AB     |        |        |        |        |        |        | EiA01     |       |      |
| AB27   | AB   | AB     | 1      | 3      |        |        |        |        | EiA01     |       |      |
| AB28   | AB   | AB     |        |        |        |        |        |        | EiA01     |       |      |
| AB29   | AB   | AB     | 3      | 3      | 5      | 5      |        |        | EiA01     |       |      |
| AB30   | AB   | AB     |        |        |        |        |        |        | EiA01     |       |      |
| AB31   | AB   | AB     |        |        |        |        |        |        | EiA01     |       |      |

| Sample | Site | Region | RAG1.1 | RAG1.2 | RAG2.1 | RAG2.2 | CMOS.1 | CMOS.2 | HAP mtDNA | mtDNA | nDNA |
|--------|------|--------|--------|--------|--------|--------|--------|--------|-----------|-------|------|
| AB32   | AB   | AB     |        |        |        |        |        |        | EiA62     |       |      |
| AB33   | AB   | AB     |        |        |        |        |        |        | EiA01     |       |      |
| AB34   | AB   | AB     |        |        |        |        |        |        | EiA01     |       |      |
| AB35   | AB   | AB     |        |        |        |        |        |        | EiA01     |       |      |
| AB36   | AB   | AB     |        |        |        |        |        |        | EiA01     |       |      |
| AB37   | AB   | AB     |        |        |        |        |        |        | EiA62     |       |      |
| AB38   | AB   | AB     |        |        |        |        |        |        | EiA24     |       |      |
| AB39   | AB   | AB     |        |        |        |        |        |        | EiA01     |       |      |
| AB40   | AB   | AB     |        |        |        |        |        |        | EiA01     |       |      |
| AB41   | AB   | AB     |        |        |        |        |        |        | EiA62     |       |      |
| AB42   | AB   | AB     |        |        |        |        |        |        | EiA01     |       |      |
| AB43   | AB   | AB     | 3      | 3      |        |        |        |        | EiA01     |       |      |
| AB44   | AB   | AB     | 3      | 3      |        |        |        |        | EiA09     |       |      |
| AB45   | AB   | AB     |        |        |        |        |        |        | EiA01     |       |      |
| AB46   | AB   | AB     |        |        |        |        |        |        | EiA01     |       |      |
| AB47   | AB   | AB     |        |        |        |        |        |        | EiA01     |       |      |
| AB48   | AB   | AB     |        |        |        |        |        |        | EiA01     |       |      |
| AB49   | AB   | AB     |        |        |        |        |        |        | EiA01     |       |      |
| AB50   | AB   | AB     |        |        |        |        |        |        | EiA01     |       |      |
| AB51   | AB   | AB     |        |        |        |        |        |        | EiA01     |       |      |
| AB52   | AB   | AB     |        |        |        |        |        |        | EiA01     |       |      |
| AB53   | AB   | AB     | 3      | 3      |        |        |        |        | EiA01     |       |      |
| AB54   | AB   | AB     |        |        |        |        |        |        | EiA01     |       |      |
| AB55   | AB   | AB     |        |        |        |        |        |        | EiA01     |       |      |
| AB56   | AB   | AB     |        |        |        |        |        |        | EiA01     |       |      |
| AB57   | AB   | AB     |        |        |        |        |        |        | EiA01     |       |      |
| AB58   | AB   | AB     |        |        |        |        |        |        | EiA01     |       |      |
| AB59   | AB   | AB     |        |        |        |        |        |        | EiA01     |       |      |
| AB60   | AB   | AB     |        |        |        |        |        |        | EiA01     |       |      |
| AB61   | AB   | AB     |        |        |        |        |        |        | EiA01     |       |      |
| AB62   | AB   | AB     |        |        |        |        |        |        | EiA01     |       |      |
| AB63   | AB   | AB     |        |        |        |        |        |        | EiA01     |       |      |
| AB64   | AB   | AB     |        |        |        |        |        |        | EiA01     |       |      |
| AB65   | AB   | AB     |        |        |        |        |        |        | EiA32     |       |      |
| AB66   | AB   | AB     |        |        |        |        |        |        | EiA01     |       |      |
| AB67   | AB   | AB     | 3      | 3      |        |        |        |        | EiA01     |       |      |
| AB68   | AB   | AB     | 3      | 3      |        |        |        |        | EiA61     |       |      |
| AB69   | AB   | AB     | 1      | 3      |        |        |        |        | EiA01     |       |      |
| AB70   | AB   | AB     | 3      | 3      |        |        |        |        | EiA62     |       |      |
| AB71   | AB   | AB     | 3      | 3      |        |        |        |        | EiA01     |       |      |
| AB72   | AB   | AB     | 3      | 3      | 5      | 5      |        |        | EiA01     |       |      |
| AB73   | AB   | AB     | 3      | 3      | 5      | 5      | 3      | 3      | EiA01     |       |      |
| AB74   | AB   | AB     | 3      | 3      | 5      | 5      | 3      | 3      | EiA01     |       |      |
| AB75   | AB   | AB     | 3      | 3      | 5      | 5      |        |        | EiA01     |       |      |

| Sample | Site      | Region | RAG1.1 | RAG1.2 | RAG2.1 | RAG2.2 | CMOS.1 | CMOS.2 | HAP mtDNA | mtDNA | nDNA  |
|--------|-----------|--------|--------|--------|--------|--------|--------|--------|-----------|-------|-------|
| AL01   | AL        | AL     |        |        |        |        |        |        | EiA01     |       |       |
| AL02   | AL        | AL     |        |        |        |        |        |        | CC-A4.2   | CC    |       |
| AL03   | AL        | AL     | 3      | 3      |        |        |        |        | EiA01     |       |       |
| AL04   | AL        | AL     |        |        |        |        |        |        | EiA01     |       |       |
| AL05   | AL        | AL     | 3      | 3      |        |        |        |        | EiA01     |       |       |
| AL06   | AL        | AL     | 3      | 3      |        |        | 3      | 10     | EiA01     |       |       |
| AP01   | AP        | BA     | 3      | 3      | 5      | 5      |        |        | EiA01     |       |       |
| AP02   | AP        | BA     |        |        |        |        |        |        | EiA01     |       |       |
| AP03   | AP        | BA     | 3      | 3      | 5      | 5      |        |        | EiA01     |       |       |
| AP04   | AP        | BA     | 3      | 3      | 5      | 5      |        |        | EiA76     |       |       |
| AP05   | AP        | BA     | 3      | 3      |        |        |        |        | EiA01     |       |       |
| AP06   | AP        | BA     | 3      | 3      | 5      | 5      |        |        | EiA01     |       |       |
| AP07   | AP        | BA     |        |        |        |        |        |        | EiA01     |       |       |
| AP11   | AP        | BA     |        |        |        |        |        |        | EiA01     |       |       |
| AP28   | AP        | BA     |        |        |        |        |        |        | EiA01     |       |       |
| AP42   | AP        | BA     | 3      | 3      |        |        |        |        | EiA01     |       |       |
| AP43   | AP        | BA     |        |        | 5      | 5      | 3      | 3      | EiA01     |       |       |
| AP44   | AP        | BA     |        |        | 5      | 5      | 3      | 10     | EiA01     |       |       |
| AP49   | AP        | BA     | 4      | 3      | 5      | 5      |        |        | EiA09     |       |       |
| AP53   | AP        | BA     |        |        |        |        |        |        | EiA01     |       |       |
| AP54   | AP        | BA     | 3      | 3      | 5      | 5      |        |        | EiA09     |       |       |
| AP55   | AP        | BA     | 3      | 3      | 5      | 5      | 3      | 3      | nan       |       |       |
| AP56   | AP        | BA     | 2      | 3      |        |        |        |        | CC-A4.2   | CC    | EixCc |
| AP57   | AP        | BA     |        |        |        |        |        |        | EiA01     |       |       |
| AP58   | AP        | BA     |        |        | 5      | 5      |        |        | EiA01     |       |       |
| AP59   | AP        | BA     |        |        |        |        |        |        | EiA01     |       |       |
| AP60   | AP        | BA     |        |        |        |        |        |        | EiA01     |       |       |
| AP61   | AP        | BA     |        |        |        |        |        |        | EiA01     |       |       |
| AP62   | AP        | BA     |        |        |        |        |        |        | EiA62     |       |       |
| AP63   | AP        | BA     |        |        |        |        |        |        | EiA32     |       |       |
| AP64   | AP        | BA     |        |        |        |        |        |        | EiA32     |       |       |
| ARV1   | ARV       | SC     | 3      | 3      |        |        |        |        | EiA01     |       |       |
| ARV2   | ARV       | SC     | 3      | 3      |        |        | 3      | 5      | EiA01     |       |       |
| ARV3   | ARV       | SC     | 3      | 3      |        |        |        |        | EiA01     |       |       |
| ARV4   | ARV       | SC     | 3      | 3      | 5      | 5      |        |        | EiA62     |       |       |
| ARV5   | ARV       | SC     | 3      | 3      | 5      | 5      | 3      | 3      | EiA62     |       |       |
| ARV6   | ARV       | SC     | 3      | 3      | 5      | 5      |        |        | EiA62     |       |       |
| ASP01  | ASPS<br>P | ASP    |        |        |        |        |        |        | EiA01     |       |       |
| ASP02  | ASPS<br>P | ASP    |        |        |        |        |        |        | EiA01     |       |       |
| ASP03  | ASPS<br>P | ASP    |        |        |        |        |        |        | EiA01     |       |       |
| ASP04  | ASPS<br>P | ASP    |        |        |        |        |        |        | EiA01     |       |       |
| ASP05  | ASPS<br>P | ASP    |        |        |        |        |        |        | EiA01     |       |       |

| Sample      | Site      | Region | RAG1.1 | RAG1.2 | RAG2.1 | RAG2.2 | CMOS.1 | CMOS.2 | HAP mtDNA | mtDNA     | nDNA  |
|-------------|-----------|--------|--------|--------|--------|--------|--------|--------|-----------|-----------|-------|
| ASP06       | ASPS<br>P | ASP    |        |        |        |        |        |        | EiA62     |           |       |
| ASP07       | ASPS<br>P | ASP    |        |        |        |        |        |        | EiA62     |           |       |
| ASP08       | ASPS<br>P | ASP    |        |        |        |        |        |        | EiA01     |           |       |
| ASP09       | ASPS<br>P | ASP    |        |        |        |        |        |        | EiA62     |           |       |
| ASP10       | ASPS<br>P | ASP    |        |        |        |        |        |        | EiA01     |           |       |
| ASP11       | ASPS<br>P | ASP    |        |        |        |        |        |        | EiA92     |           |       |
| ASP12       | ASPS<br>P | ASP    |        |        |        |        |        |        | EiA23     |           |       |
| CA01        | CA        | CA     | 3      | 3      | 5      | 5      | 3      | 10     | EiA01     |           |       |
| CA02        | CA        | CA     |        |        |        |        |        |        | EiA01     |           |       |
| CA03        | CA        | CA     |        |        |        |        |        |        | EiA01     |           |       |
| CA04        | CA        | CA     |        |        |        |        |        |        | CC-A4.2   | CC        |       |
| CA06        | CA        | CA     |        |        |        |        |        |        | EiA01     |           |       |
| CA08        | CA        | CA     | 3      | 3      |        |        |        |        | EiA01     |           |       |
| CA09        | CA        | CA     |        |        |        |        |        |        | EiA01     |           |       |
| CA10        | CA        | CA     | 3      | 3      | 5      | 5      | 5      | 5      | EiA01     |           |       |
| CA11        | CA        | CA     | 3      | 3      | 5      | 5      | 3      | 3      | EiA01     |           |       |
| <b>CA12</b> | CA        | CA     | 3      | 3      |        |        |        |        | CC-A4.2   | <b>CC</b> |       |
| CA13        | CA        | CA     | 3      | 3      |        |        |        |        | EiA62     |           |       |
| <b>CA14</b> | CA        | CA     | 3      | 3      | 5      | 5      | 3      | 3      | CC-A4.2   | <b>CC</b> |       |
| CA15        | CA        | CA     | 3      | 3      | 5      | 5      | 3      | 3      | EiA01     |           |       |
| CA16        | CA        | CA     | 3      | 3      | 5      | 5      | 3      | 3      | EiA01     |           |       |
| CA17        | CA        | CA     | 3      | 3      | 5      | 5      | 3      | 3      | EiA62     |           |       |
| CA18        | CA        | CA     | 3      | 3      | 5      | 5      | 3      | 3      | EiA01     |           |       |
| CA19        | CA        | CA     | 3      | 3      | 5      | 5      | 3      | 10     | EiA01     |           |       |
| CA20        | CA        | CA     | 3      | 3      | 5      | 5      | 3      | 10     | EiA01     |           |       |
| CA21        | CA        | CA     |        |        | 5      | 5      |        |        | nan       |           |       |
| <b>CA22</b> | CA        | CA     | 3      | 3      |        |        |        |        | CC-A4.2   | <b>CC</b> |       |
| CA23        | CA        | CA     | 2      | 3      | 2      | 5      | 2      | 3      | EiA01     |           | EixCc |
| CA24        | CA        | CA     | 2      | 3      | 2      | 5      | 1      | 10     | CC-A4.2   | CC        | EixCc |
| CA25        | CA        | CA     | 2      | 3      |        |        |        |        | CC-A4.2   | CC        | EixCc |
| CA26        | CA        | CA     | 3      | 10     |        |        |        |        | EiA01     |           |       |
| CA27        | CA        | CA     |        |        |        |        |        |        | EiA01     |           |       |
| CA28        | CA        | CA     |        |        |        |        |        |        | EiA01     |           |       |
| CA29        | CA        | CA     |        |        |        |        |        |        | EiA01     |           |       |
| CA30        | CA        | CA     |        |        |        |        |        |        | EiA01     |           |       |
| CA31        | CA        | CA     | 2      | 3      |        |        |        |        | CC-A4.2   | CC        | EixCc |
| CA32        | CA        | CA     |        |        |        |        |        |        | CC-A24.1  | CC        |       |
| CA33        | CA        | CA     |        |        |        |        |        |        | CC-A4.1   | CC        |       |
| CA34        | CA        | CA     |        |        |        |        |        |        | EiA01     |           |       |
| CA35        | CA        | CA     |        |        |        |        |        |        | EiA01     |           |       |
| CA36        | CA        | CA     | 2      | 3      | 2      | 5      |        |        | CC-A4.1   | CC        | EixCc |
| CE01        | CE        | CE     |        |        |        |        |        |        | EiA01     |           |       |

| Sample | Site | Region | RAG1.1 | RAG1.2 | RAG2.1 | RAG2.2 | CMOS.1 | CMOS.2 | HAP mtDNA   | mtDNA | nDNA  |
|--------|------|--------|--------|--------|--------|--------|--------|--------|-------------|-------|-------|
| CE02   | CE   | CE     |        |        |        |        |        |        | EiA01       |       |       |
| CE03   | CE   | CE     |        |        |        |        |        |        | EiA11       |       |       |
| CE04   | CE   | CE     | 2      | 3      |        |        |        |        | CC-A4.2     | CC    | EixCc |
| CE06   | CE   | CE     |        |        |        |        |        |        | EiA01       |       |       |
| CE07   | CE   | CE     |        |        |        |        |        |        | EiA01       |       |       |
| CE08   | CE   | CE     |        |        |        |        |        |        | EiA01       |       |       |
| CE09   | CE   | CE     |        |        |        |        |        |        | EiA01       |       |       |
| CE10   | CE   | CE     |        |        |        |        |        |        | EiA01       |       |       |
| CE11   | CE   | CE     |        |        |        |        |        |        | EiA01       |       |       |
| CE12   | CE   | CE     |        |        |        |        |        |        | EiA01       |       |       |
| CE13   | CE   | CE     |        |        |        |        |        |        | EiA62       |       |       |
| CE14   | CE   | CE     |        |        |        |        |        |        | EiA01       |       |       |
| CE15   | CE   | CE     |        |        |        |        |        |        | EiA01       |       |       |
| CE16   | CE   | CE     |        |        |        |        |        |        | EiA01       |       |       |
| CE17   | CE   | CE     |        |        |        |        |        |        | EiA01       |       |       |
| CE18   | CE   | CE     | 3      | 3      |        |        |        |        | EiA01       |       |       |
| CE19   | CE   | CE     |        |        |        |        |        |        | EiA01       |       |       |
| CE20   | CE   | CE     |        |        |        |        |        |        | EiA01       |       |       |
| CE21   | CE   | CE     | 3      | 3      |        |        | 3      | 5      | EiA01       |       |       |
| CE22   | CE   | CE     |        |        |        |        |        |        | EiA01       |       |       |
| CE23   | CE   | CE     | 1      | 3      |        |        |        |        | EiA01       |       |       |
| CE24   | CE   | CE     | 3      | 3      |        |        | 3      | 3      | EiA01       |       |       |
| CE25   | CE   | CE     |        |        |        |        |        |        | EiA01       |       |       |
| CE26   | CE   | CE     | 3      | 3      |        |        |        |        | EiA01       |       |       |
| CE27   | CE   | CE     | 3      | 3      |        |        |        |        | EiA01       |       |       |
| CE28   | CE   | CE     | 3      | 3      | 5      | 5      | 3      | 3      | EiA62       |       |       |
| CE29   | CE   | CE     |        |        |        |        |        |        | EiA01       |       |       |
| CE30   | CE   | CE     | 3      | 3      |        |        |        |        | EiA01       |       |       |
| CE31   | CE   | CE     | 3      | 3      |        |        | 3      | 5      | EiA62       |       |       |
| CE32   | CE   | CE     | 1      | 1      |        |        |        |        | hap F short | LO    |       |
| CE33   | CE   | CE     | 3      | 3      |        |        |        |        | EiA01       |       |       |
| CE34   | CE   | CE     | 3      | 3      |        |        |        |        | EiA32       |       |       |
| CE35   | CE   | CE     | 3      | 3      |        |        |        |        | EiA01       |       |       |
| CE36   | CE   | CE     |        |        |        |        |        |        | EiA01       |       |       |
| CE37   | CE   | CE     | 3      | 3      |        |        |        |        | EiA01       |       |       |
| CE38   | CE   | CE     | 3      | 3      |        |        |        |        | EiA32       |       |       |
| CE39   | CE   | CE     |        |        |        |        |        |        | EiA01       |       |       |
| CE40   | CE   | CE     | 3      | 3      |        |        |        |        | EiA01       |       |       |
| CE41   | CE   | CE     | 3      | 3      |        |        |        |        | EiA01       |       |       |
| CE42   | CE   | CE     |        |        |        |        |        |        | EiA01       |       |       |
| CE43   | CE   | CE     | 1      | 3      |        |        |        |        | hap F short | LO    |       |
| CE44   | CE   | CE     | 3      | 3      | 5      | 5      |        |        | EiA01       |       |       |
| CE45   | CE   | CE     | 3      | 3      |        |        |        |        | EiA01       |       |       |
| CE46   | CE   | CE     | 3      | 3      |        |        |        |        | EiA01       |       |       |

| Sample | Site | Region | RAG1.1 | RAG1.2 | RAG2.1 | RAG2.2 | CMOS.1 | CMOS.2 | HAP mtDNA   | mtDNA | nDNA  |
|--------|------|--------|--------|--------|--------|--------|--------|--------|-------------|-------|-------|
| CE47   | CE   | CE     | 3      | 3      | 5      | 5      |        |        | EiA01       |       |       |
| CE48   | CE   | CE     |        |        |        |        |        |        | EiA01       |       |       |
| CE49   | CE   | CE     | 3      | 3      | 7      | 7      | 3      | 3      | EiA01       |       |       |
| CE50   | CE   | CE     |        |        | 5      | 5      |        |        | EiA01       |       |       |
| CE51   | CE   | CE     | 2      | 3      | 2      | 5      |        |        | CC-A4.2     | CC    | EixCc |
| CE52   | CE   | CE     |        |        |        |        |        |        | EiA01       |       |       |
| CE53   | CE   | CE     |        |        |        |        |        |        | EiA01       |       |       |
| CE54   | CE   | CE     |        |        |        |        |        |        | EiA01       |       |       |
| CE55   | CE   | CE     |        |        |        |        |        |        | EiA01       |       |       |
| CE56   | CE   | CE     |        |        |        |        |        |        | EiA01       |       |       |
| CE57   | CE   | CE     |        |        |        |        |        |        | EiA01       |       |       |
| ES01   | ES   | ES     |        |        |        |        |        |        | EiA01       |       |       |
| ES02   | ES   | ES     |        |        |        |        |        |        | EiA01       |       |       |
| ES03   | ES   | ES     |        |        |        |        |        |        | EiA01       |       |       |
| ES04   | ES   | ES     |        |        |        |        |        |        | EiA01       |       |       |
| ES05   | ES   | ES     |        |        |        |        |        |        | hap F short | LO    |       |
| ES06   | ES   | ES     | 3      | 3      |        |        |        |        | nan         |       |       |
| ES07   | ES   | ES     |        |        |        |        |        |        | EiA01       |       |       |
| ES09   | ES   | ES     |        |        |        |        |        |        | EiA01       |       |       |
| ES10   | ES   | ES     | 3      | 3      | 5      | 5      |        |        | EiA32       |       |       |
| ES11   | ES   | ES     | 3      | 3      | 5      | 5      | 3      | 3      | EiA01       |       |       |
| ES12   | ES   | ES     | 3      | 3      | 5      | 5      |        |        | EiA01       |       |       |
| PF01   | PF   | BA     |        |        |        |        |        |        | EiA01       |       |       |
| PF02   | PF   | BA     |        |        |        |        |        |        | EiA01       |       |       |
| PF03   | PF   | BA     |        |        | 5      | 5      |        |        | EiA62       |       |       |
| PF04   | PF   | BA     | 3      | 3      | 5      | 5      |        |        | EiA01       |       |       |
| PF05   | PF   | BA     | 3      | 3      | 5      | 5      |        |        | EiA01       |       |       |
| PF06   | PF   | BA     | 2      | 3      | 2      | 5      |        |        | EiA01       |       | EixCc |
| PF07   | PF   | BA     | 3      | 3      | 5      | 5      | 3      | 5      | EiA01       |       |       |
| PF08   | PF   | BA     | 4      | 3      | 5      | 5      |        |        | EiA01       |       |       |
| PF09   | PF   | BA     | 3      | 3      | 5      | 5      |        |        | EiA32       |       |       |
| PF10   | PF   | BA     | 3      | 3      | 5      | 5      |        |        | EiA01       |       |       |
| PF11   | PF   | BA     | 3      | 3      | 5      | 5      |        |        | EiA32       |       |       |
| PF12   | PF   | BA     | 3      | 3      | 5      | 5      | 3      | 3      | EiA28       |       |       |
| PF13   | PF   | BA     |        |        | 5      | 5      |        |        | EiA01       |       |       |
| PF14   | PF   | BA     | 3      | 3      | 5      | 5      |        |        | EiA32       |       |       |
| PF15   | PF   | BA     | 3      | 3      | 5      | 5      |        |        | EiA01       |       |       |
| PF16   | PF   | BA     |        |        | 5      | 5      | 3      | 5      | EiA01       |       |       |
| PF17   | PF   | BA     | 3      | 3      | 5      | 5      | 3      | 10     | EiA01       |       |       |
| PF18   | PF   | BA     | 3      | 3      | 5      | 5      | 9      | 9      | EiA01       |       |       |
| PF19   | PF   | BA     |        |        |        |        |        |        | EiA01       |       |       |
| PF20   | PF   | BA     | 3      | 3      | 5      | 5      | 3      | 3      | EiA01       |       |       |
| PF21   | PF   | BA     | 1      | 3      | 5      | 5      |        |        | EiA32       |       |       |
| PF22   | PF   | BA     | 3      | 3      | 5      | 5      |        |        | EiA01       |       |       |

| Sample      | Site | Region | RAG1.1 | RAG1.2 | RAG2.1 | RAG2.2 | CMOS.1 | CMOS.2 | HAP mtDNA | mtDNA     | nDNA |
|-------------|------|--------|--------|--------|--------|--------|--------|--------|-----------|-----------|------|
| PF23        | PF   | BA     | 3      | 3      |        |        |        |        | EiA01     |           |      |
| PF24        | PF   | BA     |        |        |        |        |        |        | EiA01     |           |      |
| SA01        | SA   | BA     |        |        |        |        |        |        | EiA01     |           |      |
| SA02        | SA   | BA     |        |        |        |        |        |        | EiA01     |           |      |
| SA03        | SA   | BA     |        |        | 5      | 5      |        |        | EiA01     |           |      |
| SA04        | SA   | BA     | 3      | 3      |        |        |        |        | EiA01     |           |      |
| SA05        | SA   | BA     | 3      | 3      | 5      | 5      |        |        | EiA01     |           |      |
| SA06        | SA   | BA     |        |        | 5      | 5      |        |        | EiA01     |           |      |
| SA07        | SA   | BA     |        |        |        |        |        |        | EiA01     |           |      |
| SA08        | SA   | BA     |        |        |        |        |        |        | EiA01     |           |      |
| SA09        | SA   | BA     |        |        |        |        |        |        | EiA01     |           |      |
| SA10        | SA   | BA     |        |        |        |        |        |        | CC-A4.2   | CC        |      |
| SA11        | SA   | BA     |        |        |        |        |        |        | EiA01     |           |      |
| SA12        | SA   | BA     |        |        |        |        |        |        | EiA01     |           |      |
| SA13        | SA   | BA     |        |        |        |        |        |        | EiA01     |           |      |
| <b>UY01</b> | UY   | UY     |        |        | 5      | 5      |        |        | Cc-A4.2   | <b>CC</b> |      |
| UY02        | UY   | UY     |        |        | 5      | 5      |        |        | EiA32     |           |      |
| UY03        | UY   | UY     | 1      | 3      | 5      | 5      |        |        | EiA01     |           |      |
| <b>UY05</b> | UY   | UY     |        |        | 5      | 5      |        |        | Cc-A4.2   | <b>CC</b> |      |
| UY06        | UY   | UY     | 3      | 3      | 5      | 5      |        |        | EiA01     |           |      |
| UY07        | UY   | UY     |        |        |        |        |        |        | Cc-A4.2   |           |      |
| UY08        | UY   | UY     | 3      | 3      | 5      | 5      |        |        | EiA01     |           |      |
| UY09        | UY   | UY     | 3      | 3      | 5      | 5      |        |        | EiA01     |           |      |
| UY10        | UY   | UY     | 3      | 3      |        |        |        |        | nan       |           |      |
